# Supplementary material for: Screening for Antimicrobial Resistance and Genes of Exotoxins in Pseudomonas aeruginosa Isolates from Infected Dogs and Cats in Poland
Source: MDPI journal article supplement (doi:10.3390/antibiotics12071226), 2023-07-24
Supplement: s1 [file s1]

# Supplementary Materials

**Table S1.** Statistical analysis of virulence-factor-encoding genes and selected antibiotics relationship in *Pseudomonas aeruginosa* isolates from cats

|     | plcH                                                      |                  | plcN                                                      |                           | lasB                                                      |                  | Exo T                                                     |            | Exo U                                                     |                                | Exo Y                                                     |                  | Exo S                                                     |                   | Tox A                                                     |                  |
|-----|-----------------------------------------------------------|------------------|-----------------------------------------------------------|---------------------------|-----------------------------------------------------------|------------------|-----------------------------------------------------------|------------|-----------------------------------------------------------|--------------------------------|-----------------------------------------------------------|------------------|-----------------------------------------------------------|-------------------|-----------------------------------------------------------|------------------|
|     | Chi <sup>2</sup><br>Pearson/<br>Fisher's<br>exact<br>test | p                | Chi <sup>2</sup><br>Pearson/<br>Fisher's<br>exact<br>test | p                         | Chi <sup>2</sup><br>Pearson/<br>Fisher's<br>exact<br>test | p                | Chi <sup>2</sup><br>Pearson/<br>Fisher's<br>exact<br>test | p          | Chi <sup>2</sup><br>Pearson/<br>Fisher's<br>exact<br>test | p                              | Chi <sup>2</sup><br>Pearson/<br>Fisher's<br>exact<br>test | p                | Chi <sup>2</sup><br>Pearson/<br>Fisher's<br>exact<br>test | p                 | Chi <sup>2</sup><br>Pearson/<br>Fisher's<br>exact<br>test | p                |
| ENR | 1.167<br>886                                              | F<br>0.41<br>059 | 0.72<br>488                                               | 0.72<br>488               | 0.152<br>100<br>4                                         | F<br>0.52<br>173 | 0.00<br>000<br>0                                          | 1.00<br>00 | F                                                         | F<br><b>0.05</b><br><b>465</b> | F                                                         | F<br>0.61<br>326 | F                                                         | F<br>0.36<br>266  | 0.00<br>082<br>20                                         | 0.97<br>713      |
| MAR | 0.944<br>2385                                             | 0.62<br>368      | F                                                         | 0.22<br>848               | F                                                         | F<br>0.07<br>585 | 0.00<br>000<br>0                                          | 1.00<br>00 | F                                                         | F<br>0.54<br>817               | F                                                         | F<br>0.35<br>661 | F                                                         | F<br>0.36<br>266  | F                                                         | F<br>0.20<br>152 |
| CIP | 1.393<br>184                                              | 0.23<br>787      | 0.14<br>776<br>20                                         | 0.70<br>068               | 0.29<br>265<br>87                                         | 0.58<br>852      | 0.00<br>000<br>0                                          | 1.00<br>00 | 9.07<br>788<br>8                                          | 0.00<br>259                    | 3.52<br>627<br>2                                          | 0.06<br>040      | 1.85<br>645<br>0                                          | 0.17<br>304       | 2.32<br>405<br>5                                          | 0.12<br>739      |
| PRA | F                                                         | F<br>0.19<br>777 | 0.16<br>724<br>81                                         | 0.19<br>777               | F                                                         | F<br>0.18<br>721 | 0.00<br>000<br>0                                          | 1.00<br>00 | F                                                         | F<br>0.48<br>043               | F                                                         | F<br>0.68<br>109 | F                                                         | 0.08<br>961       | 2.04<br>246<br>1                                          | 0.15<br>296      |
| CAZ | 0.040<br>0258                                             | 0.84<br>143      | 0.08<br>083<br>34                                         | 0.77<br>617               | 0.03<br>612<br>24                                         | 0.84<br>926      | 0.00<br>000<br>0                                          | 1.00<br>00 | 0.04<br>002<br>58                                         | 0.84<br>143                    | 3.32<br>983<br>3                                          | 0.06<br>803      | 1.27<br>375<br>2                                          | 0.25<br>906       | F                                                         | 0.30<br>659      |
| AK  | 0.708<br>0294                                             | 0.40<br>010      | 0.06<br>126<br>30                                         | 0.80<br>451               | F                                                         | F<br>0.69<br>486 | 0.00<br>000<br>0                                          | 1.00<br>00 | F                                                         | F<br>0.40<br>516               | F                                                         | F<br>0.74<br>936 | F                                                         | F<br>0.64<br>339  | F                                                         | F<br>0.10<br>190 |
| CN  | F                                                         | F<br>0.16<br>992 | 1.39<br>548<br>4                                          | 0.49<br>771               | 1.06<br>007<br>5                                          | 0.58<br>858      | 0.00<br>000<br>0                                          | 1.00<br>00 | 0.00<br>804<br>01                                         | 0.99<br>599                    | 0.85<br>775<br>61                                         | 0.65<br>124      | 1.20<br>487<br>0                                          | 0.54<br>748       | 1.14<br>584<br>5                                          | 0.56<br>388      |
| TOB | 0.278<br>6775                                             | 0.59<br>757      | 0.02<br>955<br>67                                         | 0.86<br>350               | 0.19<br>168<br>29                                         | 0.66<br>152      | 0.00<br>000<br>0                                          | 1.00<br>00 | 0.27<br>867<br>75                                         | 0.59<br>757                    | 0.15<br>055<br>82                                         | 0.69<br>800      | 0.23<br>435<br>95                                         | 0.62<br>831       | 0.04<br>931<br>89                                         | 0.82<br>425      |
| TTC | 0.278<br>6775                                             | 0.59<br>757      | 0.02<br>955<br>67                                         | 0.86<br>350               | 0.19<br>168<br>29                                         | 0.66<br>152      | 0.00<br>000<br>0                                          | 1.00<br>00 | 0.27<br>867<br>75                                         | 0.59<br>757                    | 0.15<br>055<br>82                                         | 0.69<br>800      | 0.23<br>435<br>95                                         | 0.23<br>435<br>95 | 0.04<br>931<br>89                                         | 0.82<br>425      |
| IMP | 0.003<br>5755                                             | 0.95<br>232      | 3.74<br>177<br>0                                          | <b>0.05</b><br><b>307</b> | 0.19<br>334<br>60                                         | 0.66<br>015      | 0.00<br>000<br>0                                          | 1.00<br>00 | 0.00<br>357<br>55                                         | 0.95<br>232                    | 0.67<br>308<br>38                                         | 0.41<br>198      | 0.05<br>502<br>37                                         | 0.81<br>454       | 0.22<br>048<br>44                                         | 0.63<br>867      |
| MEM | 0.278<br>6775                                             | 0.20<br>156      | 1.63<br>104<br>7                                          | 0.20<br>156               | 0.19<br>168<br>29                                         | 0.66<br>152      | 0.00<br>000<br>0                                          | 1.00<br>00 | 2.87<br>919<br>3                                          | 0.08<br>973                    | 0.15<br>055<br>82                                         | 0.69<br>800      | 0.23<br>435<br>95                                         | 0.62<br>831       | 0.04<br>931<br>89                                         | 0.82<br>425      |

F - Fisher' exact test

**Table S2.** Statistical analysis of virulence-factor-encoding genes and selected antibiotics relationship in *Pseudomonas aeruginosa* isolates from dogs

|     | plcH                              |                  | plcN                              |                           | lasB                              |                   | Exo T                             |                  | Exo U                             |                           | Exo Y                             |                           | Exo S                             |                  | Tox A                             |                           |
|-----|-----------------------------------|------------------|-----------------------------------|---------------------------|-----------------------------------|-------------------|-----------------------------------|------------------|-----------------------------------|---------------------------|-----------------------------------|---------------------------|-----------------------------------|------------------|-----------------------------------|---------------------------|
|     | Chi^2 Pearson/Fisher's exact test | p                | Chi^2 Pearson/Fisher's exact test | p                         | Chi^2 Pearson/Fisher's exact test | p                 | Chi^2 Pearson/Fisher's exact test | p                | Chi^2 Pearson/Fisher's exact test | p                         | Chi^2 Pearson/Fisher's exact test | p                         | Chi^2 Pearson/Fisher's exact test | p                | Chi^2 Pearson/Fisher's exact test | p                         |
| ENR | F                                 | F<br>0.39<br>229 | 1.14<br>962<br>6                  | 0.56<br>281               | 1.21<br>844<br>1                  | 0.54<br>377       | 1.16<br>384<br>8                  | 0.55<br>882      | 0.94<br>871<br>38                 | 0.62<br>229               | 0.47<br>746<br>60                 | 0.78<br>763               | 3.83<br>176<br>7                  | 0.14<br>721      | 0.15<br>458<br>33                 | 0.92<br>562               |
| MAR | 2.60<br>396<br>1                  | 0.27<br>199      | 1.75<br>406<br>5                  | 0.41<br>602               | 1.37<br>408<br>4                  | 0.50<br>306       | 1.71<br>201<br>1                  | 0.42<br>486      | 5.01<br>300<br>6                  | <b>0.02</b><br><b>516</b> | 1.49<br>250<br>1                  | 0.47<br>414               | 0.55<br>363<br>41                 | 0.75<br>819      | 3.10<br>225<br>9                  | 0.21<br>201               |
| CIP | 4.65<br>066<br>6                  | 0.09<br>775      | 6.51<br>340<br>3                  | <b>0.03</b><br><b>852</b> | 1.43<br>849<br>5                  | 0.48<br>712       | 0.16<br>112<br>58                 | 0.92<br>260      | 2.00<br>763<br>3                  | 0.36<br>648               | 1.21<br>859<br>8                  | 0.54<br>373               | 2.92<br>548<br>9                  | 0.23<br>160      | 1.35<br>375<br>7                  | 0.50<br>820               |
| PRA | 0.99<br>961<br>61                 | 0.60<br>665      | 0.09<br>650<br>85                 | 0.95<br>289               | 0.26<br>741<br>98                 | 0.87<br>484       | 4.17<br>894<br>1                  | 0.12<br>375      | 0.08<br>220<br>36                 | 0.95<br>973               | 0.04<br>786<br>93                 | 0.97<br>635               | 1.17<br>636<br>5                  | 0.55<br>534      | 0.08<br>965<br>85                 | 0.95<br>616               |
| CAZ | 3.38<br>588<br>7                  | 0.06<br>576      | 0.00<br>001<br>04                 | 0.99<br>743               | 0.18<br>953<br>03                 | 0.66<br>331       | 0.09<br>200<br>50                 | 0.76<br>164      | 0.21<br>683<br>12                 | 0.64<br>147               | 1.87<br>679<br>4                  | 0.17<br>070               | 1.52<br>945<br>9                  | 0.21<br>619      | 6.24<br>789<br>9                  | <b>0.01</b><br><b>243</b> |
| AK  | 0.24<br>512<br>81                 | 0.88<br>465      | 2.56<br>978<br>8                  | 0.27<br>668               | F<br>F<br>0.62<br>019             | 0.50<br>406<br>18 | 0.77<br>722                       | 3.65<br>882<br>2 | <b>0.05</b><br><b>577</b>         | 5.67<br>491<br>6          | <b>0.05</b><br><b>857</b>         | 3.34<br>841<br>4          | 0.18<br>746                       | 1.15<br>069<br>6 | 0.56<br>251                       |                           |
| CN  | 5.33<br>666<br>1                  | 0.06<br>937      | 1.87<br>106<br>2                  | 0.39<br>238               | 3.48<br>576<br>9                  | 0.17<br>501       | 3.14<br>895<br>0                  | 0.20<br>712      | 0.16<br>592<br>24                 | 0.92<br>039               | 13.0<br>791<br>8                  | <b>0.00</b><br><b>145</b> | 0.85<br>994<br>55                 | 0.65<br>053      | 3.28<br>988<br>9                  | 0.19<br>302               |
| TOB | 0.26<br>235<br>08                 | 0.60<br>851      | 0.73<br>586<br>60                 | 0.39<br>099               | 1.10<br>892<br>3                  | 0.29<br>232       | 0.62<br>606<br>47                 | 0.42<br>880      | 0.03<br>394<br>16                 | 0.85<br>383               | 1.22<br>378<br>8                  | 0.26<br>862               | 0.34<br>818<br>17                 | 0.55<br>514      | 2.97<br>678<br>0                  | 0.08<br>447               |
| TTC | 0.00<br>015<br>72                 | 0.99<br>000      | 0.15<br>365<br>31                 | 0.69<br>507               | 1.51<br>608<br>8                  | 0.21<br>821       | 0.73<br>596<br>53                 | 0.39<br>096      | 0.51<br>898<br>62                 | 0.47<br>127               | 1.05<br>628<br>2                  | 0.30<br>406               | 1.17<br>991<br>4                  | 0.27<br>737      | 2.56<br>933<br>4                  | 0.10<br>895               |
| IMP | 0.00<br>754<br>87                 | 0.93<br>076      | 0.03<br>185<br>07                 | 0.85<br>836               | 1.47<br>284<br>2                  | 0.22<br>490       | 0.71<br>497<br>19                 | 0.39<br>780      | 0.71<br>497<br>19                 | 0.39<br>780               | 0.04<br>071<br>50                 | 0.84<br>009               | 0.92<br>328<br>76                 | 0.33<br>661      | 3.19<br>118<br>9                  | 0.07<br>404               |
| MEM | 0.00<br>356<br>78                 | 0.95<br>237      | 2.14<br>139<br>6                  | 0.14<br>337               | 0.25<br>569<br>12                 | 0.61<br>310       | 3.37<br>922<br>0                  | 0.56<br>103      | 0.78<br>120<br>13                 | 0.37<br>677               | 0.08<br>629<br>58                 | 0.76<br>894               | 0.08<br>755<br>06                 | 0.76<br>731      | 0.79<br>363<br>63                 | 0.37<br>300               |

F - Fisher' exact test
